# Supplementary material for: Music Interventions for Anxiety in Pregnant Women: A Systematic Review and Meta-Analysis of Randomized Controlled Trials
Source: PubMed Central journal article supplement (PMC6912569; doi:10.3390/jcm8111884), 2019-11-06
Supplement: jcm-08-01884-s001.pdf [file jcm-08-01884-s001.pdf]

## Supplementary Materials

Table S1. PRISMA checklist.

| Section/Topic.                     | #  | Checklist Item                                                                                                                                                                                                                                                                                              | Reported on Page # |
|------------------------------------|----|-------------------------------------------------------------------------------------------------------------------------------------------------------------------------------------------------------------------------------------------------------------------------------------------------------------|--------------------|
|                                    |    | Title                                                                                                                                                                                                                                                                                                       |                    |
|                                    | 1  | Identify the report as a systematic review, meta-analysis, or both.                                                                                                                                                                                                                                         | 1                  |
|                                    |    | Abstract                                                                                                                                                                                                                                                                                                    |                    |
| Structured summary                 | 2  | Provide a structured summary including, as applicable: background; objectives; data sources; study eligibility criteria, participants, and interventions; study appraisal and synthesis methods; results; limitations; conclusions and implications of key findings; systematic review registration number. | 1                  |
|                                    |    | Introduction                                                                                                                                                                                                                                                                                                |                    |
| Rationale                          | 3  | Describe the rationale for the review in the context of what is already known.                                                                                                                                                                                                                              | 1–2                |
| Objectives                         | 4  | Provide an explicit statement of questions being addressed with reference to participants, interventions, comparisons, outcomes, and study design (PICOS).                                                                                                                                                  | 2                  |
|                                    |    | Methods                                                                                                                                                                                                                                                                                                     |                    |
| Protocol and registration          | 5  | Indicate if a review protocol exists, if and where it can be accessed (e.g., Web address), and, if available, provide registration information including registration number.                                                                                                                               | NA                 |
| Eligibility criteria               | 6  | Specify study characteristics (e.g., PICOS, length of follow-up) and report characteristics (e.g., years considered, language, publication status) used as criteria for eligibility, giving rationale.                                                                                                      | 2                  |
| Information sources                | 7  | Describe all information sources (e.g., databases with dates of coverage, contact with study authors to identify additional studies) in the search and date last searched.                                                                                                                                  | 2                  |
| Search                             | 8  | Present full electronic search strategy for at least one database, including any limits used, such that it could be repeated.                                                                                                                                                                               | Table S2           |
| Study selection                    | 9  | State the process for selecting studies (i.e., screening, eligibility, included in systematic review, and, if applicable, included in the meta-analysis).                                                                                                                                                   | 2, Figure 1        |
| Data collection process            | 10 | Describe method of data extraction from reports (e.g., piloted forms, independently, in duplicate) and any processes for obtaining and confirming data from investigators.                                                                                                                                  | 2                  |
| Data items                         | 11 | List and define all variables for which data were sought (e.g., PICOS, funding sources) and any assumptions and simplifications made.                                                                                                                                                                       | 2, 5               |
| Risk of bias in individual studies | 12 | Describe methods used for assessing risk of bias of individual studies (including specification of whether this was done at the study or outcome level), and how this information is to be used in any data synthesis.                                                                                      | 5                  |
| Summary measures                   | 13 | State the principal summary measures (e.g., risk ratio, difference in means).                                                                                                                                                                                                                               | 5                  |
| Synthesis of results               | 14 | Describe the methods of handling data and combining results of studies, if done, including measures of consistency (e.g., I <sup>2</sup> ) for each meta-analysis.                                                                                                                                          | 5                  |

|                               |    |                                                                                                                                                                                                          |                                               |
|-------------------------------|----|----------------------------------------------------------------------------------------------------------------------------------------------------------------------------------------------------------|-----------------------------------------------|
| Risk of bias across studies   | 15 | Specify any assessment of risk of bias that may affect the cumulative evidence (e.g., publication bias, selective reporting within studies).                                                             | 5                                             |
| Additional analyses           | 16 | Describe methods of additional analyses (e.g., sensitivity or subgroup analyses, meta-regression), if done, indicating which were pre-specified.                                                         | 5                                             |
| Results                       |    |                                                                                                                                                                                                          |                                               |
| Study selection               | 17 | Give numbers of studies screened, assessed for eligibility, and included in the review, with reasons for exclusions at each stage, ideally with a flow diagram.                                          | 5–6, Figure 1                                 |
| Study characteristics         | 18 | For each study, present characteristics for which data were extracted (e.g., study size, PICOS, follow-up period) and provide the citations.                                                             | 3–6, Table 1                                  |
| Risk of bias within studies   | 19 | Present data on risk of bias of each study and, if available, any outcome level assessment (see item 12).                                                                                                | 7, Table S3                                   |
| Results of individual studies | 20 | For all outcomes considered (benefits or harms), present, for each study: (a) simple summary data for each intervention group (b) effect estimates and confidence intervals, ideally with a forest plot. | 7, Figure 2                                   |
| Synthesis of results          | 21 | Present results of each meta-analysis done, including confidence intervals and measures of consistency.                                                                                                  | 7                                             |
| Risk of bias across studies   | 22 | Present results of any assessment of risk of bias across studies (see Item 15).                                                                                                                          | 7, Figure S3                                  |
| Additional analysis           | 23 | Give results of additional analyses, if done (e.g., sensitivity or subgroup analyses, meta-regression [see Item 16]).                                                                                    | 7–8, Figure 3, Figure 4, Figure S1, Figure S2 |
| Discussion                    |    |                                                                                                                                                                                                          |                                               |
| Summary of evidence           | 24 | Summarize the main findings including the strength of evidence for each main outcome; consider their relevance to key groups (e.g., healthcare providers, users, and policy makers).                     | 8–9                                           |
| Limitations                   | 25 | Discuss limitations at study and outcome level (e.g., risk of bias), and at review-level (e.g., incomplete retrieval of identified research, reporting bias).                                            | 10                                            |
| Conclusions                   | 26 | Provide a general interpretation of the results in the context of other evidence, and implications for future research.                                                                                  | 10                                            |
| Funding                       |    |                                                                                                                                                                                                          |                                               |
| Funding                       | 27 | Describe sources of funding for the systematic review and other support (e.g., supply of data); role of funders for the systematic review.                                                               | 10                                            |

Table S2. Search strategy.

| Search strategy in Pubmed | Query                                                                                                                                                                                                                                                                                                                                                                                                                                                                                                                                                                                                                                                                                                                                                                                                                                                                                                                                                                  |
|---------------------------|------------------------------------------------------------------------------------------------------------------------------------------------------------------------------------------------------------------------------------------------------------------------------------------------------------------------------------------------------------------------------------------------------------------------------------------------------------------------------------------------------------------------------------------------------------------------------------------------------------------------------------------------------------------------------------------------------------------------------------------------------------------------------------------------------------------------------------------------------------------------------------------------------------------------------------------------------------------------|
| #120                      | Search (((((((((((((((((((pregnancy) OR Pregnancies) OR Gestation) OR Fertilization) OR Postnatal) OR Postpartum) OR Antenatal) OR perinatal) OR antepartum) OR peripartum) OR Pregnant Women) OR Labor, Obstetric) OR delivery) OR labor) OR Parturition) OR childbirth) OR birth*) OR puerperium) OR doing month)) OR (Cesarean Section OR abdominal deliver* OR C-Section OR C Section OR Caesarean Section*)) AND (((((((((((((((((((music therapy) OR music) OR lullaby) OR rhythm[Title/Abstract]) OR melody[Title/Abstract]) OR Jazz[Title/Abstract]) OR song[Title/Abstract])) AND (((((((((((((((((((Anxiety) OR Anxiety) OR Hypervigilance) OR Nervousness) OR Stress, Psychological) OR Mental Suffering) OR emotional stress) OR life stress) OR Expressed Emotion) OR Irritable Mood) OR self-rating anxiety scale) OR State-Trait Anxiety Inventory) OR STAI[Title/Abstract]) OR Test Anxiety Scale) OR Test Anxiety Questionnaire) Sort by: [pubsolr12] |
| #121                      | Search (((Cesarean Section OR abdominal deliver* OR C-Section OR C Section OR Caesarean Section*)) AND (((((((((((((((((((music therapy) OR music) OR lullaby) OR rhythm[Title/Abstract]) OR melody[Title/Abstract]) OR Jazz[Title/Abstract]) OR song[Title/Abstract])) AND (((((((((((((((((((Anxiety) OR Anxiety) OR Hypervigilance) OR Nervousness) OR Stress, Psychological) OR Mental Suffering) OR emotional stress) OR life stress) OR Expressed Emotion) OR Irritable Mood) OR self-rating anxiety scale) OR State-Trait Anxiety Inventory) OR STAI[Title/Abstract]) OR Test Anxiety Scale) OR Test Anxiety Questionnaire)                                                                                                                                                                                                                                                                                                                                     |
| #117                      | Search Cesarean Section OR abdominal deliver* OR C-Section OR C Section OR Caesarean Section*                                                                                                                                                                                                                                                                                                                                                                                                                                                                                                                                                                                                                                                                                                                                                                                                                                                                          |
| #112                      | Search (((((((((((((((((((pregnancy) OR Pregnancies) OR Gestation) OR Fertilization) OR Postnatal) OR Postpartum) OR Antenatal) OR perinatal) OR antepartum) OR peripartum) OR Pregnant Women) OR Labor, Obstetric) OR delivery) OR labor) OR Parturition) OR childbirth) OR birth*) OR puerperium) OR doing month)) AND (((((((((((((((((((music therapy) OR music) OR lullaby) OR rhythm[Title/Abstract]) OR melody[Title/Abstract]) OR Jazz[Title/Abstract]) OR song[Title/Abstract])) AND (((((((((((((((((((Anxiety) OR Anxiety) OR Hypervigilance) OR Nervousness) OR Stress, Psychological) OR Mental Suffering) OR emotional stress) OR life stress) OR Expressed Emotion) OR Irritable Mood) OR self-rating anxiety scale) OR State-Trait Anxiety Inventory) OR STAI[Title/Abstract]) OR Test Anxiety Scale) OR Test Anxiety Questionnaire) Sort by: [pubsolr12]                                                                                              |
| #110                      | Search (((((((((((((((((((Anxiety) OR Anxiety) OR Hypervigilance) OR Nervousness) OR Stress, Psychological) OR Mental Suffering) OR emotional stress) OR life stress) OR Expressed Emotion) OR Irritable Mood) OR self-rating anxiety scale) OR State-Trait Anxiety Inventory) OR STAI[Title/Abstract]) OR Test Anxiety Scale) OR Test Anxiety Questionnaire                                                                                                                                                                                                                                                                                                                                                                                                                                                                                                                                                                                                           |
| #109                      | Search Test Anxiety Questionnaire                                                                                                                                                                                                                                                                                                                                                                                                                                                                                                                                                                                                                                                                                                                                                                                                                                                                                                                                      |
| #108                      | Search Test Anxiety Scale                                                                                                                                                                                                                                                                                                                                                                                                                                                                                                                                                                                                                                                                                                                                                                                                                                                                                                                                              |
| #105                      | Search STAI[Title/Abstract]                                                                                                                                                                                                                                                                                                                                                                                                                                                                                                                                                                                                                                                                                                                                                                                                                                                                                                                                            |
| #104                      | Search State-Trait Anxiety Inventory                                                                                                                                                                                                                                                                                                                                                                                                                                                                                                                                                                                                                                                                                                                                                                                                                                                                                                                                   |
| #102                      | Search self-rating anxiety scale                                                                                                                                                                                                                                                                                                                                                                                                                                                                                                                                                                                                                                                                                                                                                                                                                                                                                                                                       |
| #101                      | Search Irritable Mood                                                                                                                                                                                                                                                                                                                                                                                                                                                                                                                                                                                                                                                                                                                                                                                                                                                                                                                                                  |
| #99                       | Search Expressed Emotion                                                                                                                                                                                                                                                                                                                                                                                                                                                                                                                                                                                                                                                                                                                                                                                                                                                                                                                                               |
| #96                       | Search life stress                                                                                                                                                                                                                                                                                                                                                                                                                                                                                                                                                                                                                                                                                                                                                                                                                                                                                                                                                     |
| #95                       | Search emotional stress                                                                                                                                                                                                                                                                                                                                                                                                                                                                                                                                                                                                                                                                                                                                                                                                                                                                                                                                                |

|     |                                                                                                                                                                                                                                                                                                                |
|-----|----------------------------------------------------------------------------------------------------------------------------------------------------------------------------------------------------------------------------------------------------------------------------------------------------------------|
| #94 | Search Mental Suffering                                                                                                                                                                                                                                                                                        |
| #93 | Search Stress, Psychological                                                                                                                                                                                                                                                                                   |
| #90 | Search Nervousness                                                                                                                                                                                                                                                                                             |
| #89 | Search Hypervigilance                                                                                                                                                                                                                                                                                          |
| #88 | Search Anxiety                                                                                                                                                                                                                                                                                                 |
| #87 | Search Anxiety Sort by: [pubsolr12]                                                                                                                                                                                                                                                                            |
| #84 | Search ((((((music therapy) OR music) OR lullaby) OR rhythm[Title/Abstract]) OR melody[Title/Abstract]) OR Jazz[Title/Abstract]) OR song[Title/Abstract]                                                                                                                                                       |
| #83 | Search song[Title/Abstract]                                                                                                                                                                                                                                                                                    |
| #82 | Search Jazz[Title/Abstract]                                                                                                                                                                                                                                                                                    |
| #81 | Search melody[Title/Abstract]                                                                                                                                                                                                                                                                                  |
| #80 | Search rhythm[Title/Abstract]                                                                                                                                                                                                                                                                                  |
| #79 | Search lullaby                                                                                                                                                                                                                                                                                                 |
| #78 | Search music                                                                                                                                                                                                                                                                                                   |
| #77 | Search music therapy                                                                                                                                                                                                                                                                                           |
| #76 | Search (((((((((((((((pregnancy) OR Pregnancies) OR Gestation) OR Fertilization) OR Postnatal) OR Postpartum) OR Antenatal) OR perinatal) OR antepartum) OR peripartum) OR Pregnant Women) OR Labor, Obstetric) OR delivery) OR labor) OR Parturition) OR childbirth) OR birth*) OR puerperium) OR doing month |
| #75 | Search doing month                                                                                                                                                                                                                                                                                             |
| #74 | Search puerperium                                                                                                                                                                                                                                                                                              |
| #73 | Search birth* Sort by: [pubsolr12]                                                                                                                                                                                                                                                                             |
| #71 | Search childbirth Sort by: [relevance]                                                                                                                                                                                                                                                                         |
| #72 | Search Parturition Sort by: [pubsolr12]                                                                                                                                                                                                                                                                        |
| #70 | Search labor Sort by: [pubsolr12]                                                                                                                                                                                                                                                                              |
| #66 | Search delivery Sort by: [pubsolr12]                                                                                                                                                                                                                                                                           |
| #64 | Search Labor, Obstetric Sort by: [pubsolr12]                                                                                                                                                                                                                                                                   |
| #61 | Search Pregnant Women Sort by: [pubsolr12]                                                                                                                                                                                                                                                                     |
| #57 | Search peripartum Sort by: [pubsolr12]                                                                                                                                                                                                                                                                         |
| #56 | Search antepartum Sort by: [pubsolr12]                                                                                                                                                                                                                                                                         |
| #55 | Search perinatal Sort by: [pubsolr12]                                                                                                                                                                                                                                                                          |
| #53 | Search Antenatal Sort by: [pubsolr12]                                                                                                                                                                                                                                                                          |
| #50 | Search Postpartum Sort by: [pubsolr12]                                                                                                                                                                                                                                                                         |
| #49 | Search Postnatal Sort by: [pubsolr12]                                                                                                                                                                                                                                                                          |
| #46 | Search Fertilization Sort by: [pubsolr12]                                                                                                                                                                                                                                                                      |
| #43 | Search Gestation Sort by: [pubsolr12]                                                                                                                                                                                                                                                                          |

|                                            |                                                                                                                                                                                                                                                                                                                                                                                                                                                                                                                                                                                                                                  |
|--------------------------------------------|----------------------------------------------------------------------------------------------------------------------------------------------------------------------------------------------------------------------------------------------------------------------------------------------------------------------------------------------------------------------------------------------------------------------------------------------------------------------------------------------------------------------------------------------------------------------------------------------------------------------------------|
| #42                                        | Search Pregnancies Sort by: [pubsolr12]                                                                                                                                                                                                                                                                                                                                                                                                                                                                                                                                                                                          |
| #39                                        | Search pregnancy Sort by: [pubsolr12]                                                                                                                                                                                                                                                                                                                                                                                                                                                                                                                                                                                            |
| <b>Search strategy in Embase</b>           |                                                                                                                                                                                                                                                                                                                                                                                                                                                                                                                                                                                                                                  |
| #28                                        | #13 AND #19 AND #27                                                                                                                                                                                                                                                                                                                                                                                                                                                                                                                                                                                                              |
| #27                                        | #20 OR #21 OR #22 OR #23 OR #24 OR #25 OR #26                                                                                                                                                                                                                                                                                                                                                                                                                                                                                                                                                                                    |
| #26                                        | <b>anxiety':ti,ab,kw OR 'hypervigilance':ti,ab,kw OR 'nervousness':ti,ab,kw OR 'stress, psychological':ti,ab,kw OR 'emotional stress':ti,ab,kw OR 'life stress':ti,ab,kw OR 'mental suffering':ti,ab,kw OR 'emotions':ti,ab,kw OR 'irritable mood':ti,ab,kw OR 'expressed emotion':ti,ab,kw OR 'test anxiety scale':ti,ab,kw OR 'state-trait anxiety inventory':ti,ab,kw OR 'stai':ti,ab,kw OR 'mental health':ti,ab,kw</b>                                                                                                                                                                                                      |
| #25                                        | <b>'state trait anxiety inventory'/exp</b>                                                                                                                                                                                                                                                                                                                                                                                                                                                                                                                                                                                       |
| #24                                        | <b>'anxiety assessment'/exp</b>                                                                                                                                                                                                                                                                                                                                                                                                                                                                                                                                                                                                  |
| #23                                        | <b>'life stress'/exp</b>                                                                                                                                                                                                                                                                                                                                                                                                                                                                                                                                                                                                         |
| #22                                        | <b>'mental stress'/exp</b>                                                                                                                                                                                                                                                                                                                                                                                                                                                                                                                                                                                                       |
| #21                                        | <b>'anxiety disorder'/exp</b>                                                                                                                                                                                                                                                                                                                                                                                                                                                                                                                                                                                                    |
| #20                                        | <b>'anxiety'/exp</b>                                                                                                                                                                                                                                                                                                                                                                                                                                                                                                                                                                                                             |
| #19                                        | #14 OR #15 OR #16 OR #17 OR #18                                                                                                                                                                                                                                                                                                                                                                                                                                                                                                                                                                                                  |
| #18                                        | <b>(('music' NEAR/2 'therapy'):ti,ab,kw) OR 'music':ti,ab,kw OR 'lullaby':ti,ab,kw OR 'rhythm':ti,ab,kw OR 'melody':ti,ab,kw OR 'singing':ti,ab,kw OR 'song':ti,ab,kw OR</b>                                                                                                                                                                                                                                                                                                                                                                                                                                                     |
| #17                                        | <b>'jazz':ti,ab,kw</b>                                                                                                                                                                                                                                                                                                                                                                                                                                                                                                                                                                                                           |
| #16                                        | <b>'melody'/exp</b>                                                                                                                                                                                                                                                                                                                                                                                                                                                                                                                                                                                                              |
| #15                                        | <b>'singing'/exp</b>                                                                                                                                                                                                                                                                                                                                                                                                                                                                                                                                                                                                             |
| #14                                        | <b>'music'/exp</b>                                                                                                                                                                                                                                                                                                                                                                                                                                                                                                                                                                                                               |
| #13                                        | <b>'music therapy'/exp</b>                                                                                                                                                                                                                                                                                                                                                                                                                                                                                                                                                                                                       |
| #12                                        | #1 OR #2 OR #3 OR #4 OR #5 OR #6 OR #7 OR #8 OR #9 OR #10 OR #11 OR #12<br><b>'postnatal':ti,ab,kw OR 'antenatal':ti,ab,kw OR 'perinatal':ti,ab,kw OR 'antepartum':ti,ab,kw OR 'peripartum':ti,ab,kw OR 'postpartum':ti,ab,kw OR 'puerperium':ti,ab,kw OR 'pregnancy':ti,ab,kw OR 'gestation':ti,ab,kw OR 'fertilization':ti,ab,kw OR 'birth':ti,ab,kw OR 'pregnant':ti,ab,kw OR 'delivery':ti,ab,kw OR 'childbirth':ti,ab,kw OR 'labou':ti,ab,kw OR 'doin month':ti,ab,kw OR 'expectant mother*':ti,ab,kw OR 'cesarean section':ti,ab,kw OR 'c-section':ti,ab,kw OR 'caesarean section*':ti,ab,kw OR 'labor stage':ti,ab,kw</b> |
| #11                                        | <b>'cesarean section'/exp</b>                                                                                                                                                                                                                                                                                                                                                                                                                                                                                                                                                                                                    |
| #10                                        | <b>'postnatal care'/exp</b>                                                                                                                                                                                                                                                                                                                                                                                                                                                                                                                                                                                                      |
| #9                                         | <b>'expectant mother'/exp</b>                                                                                                                                                                                                                                                                                                                                                                                                                                                                                                                                                                                                    |
| #8                                         | <b>'perinatal period'/exp</b>                                                                                                                                                                                                                                                                                                                                                                                                                                                                                                                                                                                                    |
| #7                                         | <b>'childbirth'/exp</b>                                                                                                                                                                                                                                                                                                                                                                                                                                                                                                                                                                                                          |
| #6                                         | <b>'fertilization'/exp</b>                                                                                                                                                                                                                                                                                                                                                                                                                                                                                                                                                                                                       |
| #5                                         | <b>'obstetric delivery'/exp</b>                                                                                                                                                                                                                                                                                                                                                                                                                                                                                                                                                                                                  |
| #4                                         | <b>'labor stage'/exp</b>                                                                                                                                                                                                                                                                                                                                                                                                                                                                                                                                                                                                         |
| #3                                         | <b>'labor'/exp</b>                                                                                                                                                                                                                                                                                                                                                                                                                                                                                                                                                                                                               |
| #2                                         | <b>'pregnant woman'/exp</b>                                                                                                                                                                                                                                                                                                                                                                                                                                                                                                                                                                                                      |
| #1                                         | <b>'pregnancy'/exp</b>                                                                                                                                                                                                                                                                                                                                                                                                                                                                                                                                                                                                           |
| <b>Search strategy in Cochrane Library</b> |                                                                                                                                                                                                                                                                                                                                                                                                                                                                                                                                                                                                                                  |

| Query |                                                                                                                                                                                                                                                                                                                                                                                                                |
|-------|----------------------------------------------------------------------------------------------------------------------------------------------------------------------------------------------------------------------------------------------------------------------------------------------------------------------------------------------------------------------------------------------------------------|
| #1    | MeSH descriptor: [Pregnancy] explode all trees                                                                                                                                                                                                                                                                                                                                                                 |
| #2    | MeSH descriptor: [Fertilization] explode all trees                                                                                                                                                                                                                                                                                                                                                             |
| #3    | MeSH descriptor: [Pregnant Women] explode all trees                                                                                                                                                                                                                                                                                                                                                            |
| #4    | MeSH descriptor: [Labor, Obstetric] explode all trees                                                                                                                                                                                                                                                                                                                                                          |
| #5    | MeSH descriptor: [Cesarean Section] explode all trees                                                                                                                                                                                                                                                                                                                                                          |
| #6    | pregnancy or Pregnancies or Gestation or Fertilization or Postnatal or Postpartum or Antenatal or perinatal or antepartum or peripartum or Pregnant Women or Labor, Obstetric or delivery or labor or Parturition or childbirth or birth* or puerperium or doing month or Cesarean Section or abdominal deliver* or C-Section or C Section or Cesarean Section* :ti,ab,kw (Word variations have been searched) |
| #7    | #1 or #2 or #3 or #4 or #5 or #6                                                                                                                                                                                                                                                                                                                                                                               |
| #8    | MeSH descriptor: [Music Therapy] explode all trees                                                                                                                                                                                                                                                                                                                                                             |
| #9    | MeSH descriptor: [Music] explode all trees                                                                                                                                                                                                                                                                                                                                                                     |
| #10   | music therapy or music or lullaby or rhythm or melody or Jazz or song:ti,ab,kw (Word variations have been searched)                                                                                                                                                                                                                                                                                            |
| #11   | #8 or #9 or #10                                                                                                                                                                                                                                                                                                                                                                                                |
| #12   | MeSH descriptor: [Anxiety] explode all trees                                                                                                                                                                                                                                                                                                                                                                   |
| #13   | MeSH descriptor: [Stress, Physiological] explode all trees                                                                                                                                                                                                                                                                                                                                                     |
| #14   | MeSH descriptor: [Test Anxiety Scale] explode all trees                                                                                                                                                                                                                                                                                                                                                        |
| #15   | Anxiety or Hypervigilance or Nervousness or Stress, Psychological or Mental Suffering or emotional stress or life stress or Expressed Emotion or Irritable Mood or self-rating anxiety scale or State-Trait Anxiety Inventory or STAI or Test Anxiety Scale or Test Anxiety Questionnaire:ti,ab,kw (Word variations have been searched)                                                                        |
| #16   | #12 or #13 or #14 or #15                                                                                                                                                                                                                                                                                                                                                                                       |
| #17   | #7 and #11 and #16                                                                                                                                                                                                                                                                                                                                                                                             |

#### Search Strategy in CINAHL

|     |                                                                                                                                                                                                                                                                                                                                                                                                                                                                                                                      |                                         |
|-----|----------------------------------------------------------------------------------------------------------------------------------------------------------------------------------------------------------------------------------------------------------------------------------------------------------------------------------------------------------------------------------------------------------------------------------------------------------------------------------------------------------------------|-----------------------------------------|
| S22 | S12 AND S16 AND S21                                                                                                                                                                                                                                                                                                                                                                                                                                                                                                  | Search modes - Find all my search terms |
| S21 | S17 OR S18 OR S19 OR S20                                                                                                                                                                                                                                                                                                                                                                                                                                                                                             | Search modes - Find all my search terms |
| S20 | TI ( Anxiety OR Hypervigilance OR Nervousness OR Stress, Psychological OR Mental Suffering OR emotional stress OR life stress OR Expressed Emotion OR Irritable Mood OR self-rating anxiety scale OR State-Trait Anxiety Inventory OR STAI OR Test Anxiety Scale OR Test Anxiety Questionnaire ) OR AB ( Anxiety OR Hypervigilance OR Nervousness OR Stress, Psychological OR Mental Suffering OR emotional stress OR life stress OR Expressed Emotion OR Irritable Mood OR self-rating anxiety scale OR State-Trait | Search modes - Find all my search terms |
| S19 | (MH "Self-Rating Anxiety Scale")                                                                                                                                                                                                                                                                                                                                                                                                                                                                                     | Search modes - Find all my search terms |
| S18 | (MH "Stress, Physiological")                                                                                                                                                                                                                                                                                                                                                                                                                                                                                         | Search modes - Find all my search terms |
| S17 | (MH "Anxiety") OR (MH "Anxiety Disorders")                                                                                                                                                                                                                                                                                                                                                                                                                                                                           | Search modes - Find all my search terms |
| S16 | S13 OR S14 OR S15                                                                                                                                                                                                                                                                                                                                                                                                                                                                                                    | Search modes - Boolean/Phrase           |

|     |                                                                                                                                                                                                                                                                                                                         |                                         |
|-----|-------------------------------------------------------------------------------------------------------------------------------------------------------------------------------------------------------------------------------------------------------------------------------------------------------------------------|-----------------------------------------|
| S15 | TI ( music therapy OR music OR lullaby OR rhythm OR melody OR Jazz OR song ) OR AB ( music therapy OR music OR lullaby OR rhythm OR melody OR Jazz OR song )OR AB music therapy OR music OR lullaby OR rhythm OR melody OR Jazz OR song ) OR AB ( music therapy OR music OR lullaby OR rhythm OR melody OR Jazz OR song | Search modes - Find all my search terms |
| S14 | (MH "Music") OR (MH "Singing")                                                                                                                                                                                                                                                                                          | Search modes - Find all my search terms |
| S13 | (MH "Music Therapy")                                                                                                                                                                                                                                                                                                    | Search modes - Find all my search terms |
| S12 | S1 OR S2 OR S3 OR S4 OR S5 OR S6 OR S7 OR S8 OR S9 OR S10 OR S11 OR Cesarean Section OR abdominal deliver* OR C-Section OR C Section OR Caesarean Section*                                                                                                                                                              | Search modes - Boolean/Phrase           |
| S11 | AB pregnancy OR Pregnancies OR Gestation OR Fertilization OR Postnatal OR Postpartum OR Antenatal OR perinatal OR antepartum OR peripartum OR Pregnant Women OR Labor, Obstetric OR delivery OR labor OR Parturition OR childbirth OR birth* OR puerperium OR doing month                                               | Search modes - Find all my search terms |
| S10 | TI pregnancy OR Pregnancies OR Gestation OR Fertilization OR Postnatal OR Postpartum OR Antenatal OR perinatal OR antepartum OR peripartum OR Pregnant Women OR Labor, Obstetric OR delivery OR labor OR Parturition OR childbirth OR birth* OR puerperium OR doing month                                               | Search modes - Find all my search terms |
| S9  | (MH "Childbirth")                                                                                                                                                                                                                                                                                                       | Search modes - Find all my search terms |
| S8  | (MH "Puerperium")                                                                                                                                                                                                                                                                                                       | Search modes - Find all my search terms |
| S7  | (MH "Postpartum (Omaha)")                                                                                                                                                                                                                                                                                               | Search modes - Find all my search terms |
| S6  | (MH "Perinatal Care")                                                                                                                                                                                                                                                                                                   | Search modes - Find all my search terms |
| S5  | (MH "Prenatal Care")                                                                                                                                                                                                                                                                                                    | Search modes - Find all my search terms |
| S4  | (MH "Labor") OR "labor" OR (MH "Labor Stage, Third") OR (MH "Labor Stage, Second") OR (MH "Labor Stage, First")                                                                                                                                                                                                         | Search modes - Find all my search terms |
| S3  | (MH "Expectant Mothers")                                                                                                                                                                                                                                                                                                | Search modes - Find all my search terms |
| S2  | (MM "Fertilization")                                                                                                                                                                                                                                                                                                    | Search modes - Find all my search terms |
| S1  | (MH "Pregnancy+")                                                                                                                                                                                                                                                                                                       | Search modes - Find all my search terms |

### Search Strategy in PsycINFO

| Search ID# | Search Terms                                                                                                                                                                                                                                                                                      | Search Options                          |
|------------|---------------------------------------------------------------------------------------------------------------------------------------------------------------------------------------------------------------------------------------------------------------------------------------------------|-----------------------------------------|
| S4         | S1 AND S2 AND S3                                                                                                                                                                                                                                                                                  | Search modes - Find all my search terms |
| S3         | TI/AB (Anxiety OR Hypervigilance OR Nervousness OR Stress, Psychological OR Mental Suffering OR emotional stress OR life stress OR Expressed Emotion OR Irritable Mood OR self-rating anxiety scale OR State-Trait Anxiety Inventory OR STAI OR Test Anxiety Scale OR Test Anxiety Questionnaire) | Search modes - Find all my search terms |

|    |                                                                                                                                                                                                                                                                               |                                         |
|----|-------------------------------------------------------------------------------------------------------------------------------------------------------------------------------------------------------------------------------------------------------------------------------|-----------------------------------------|
| S2 | TI/AB(music therapy OR music OR lullaby OR rhythm OR melody OR Jazz OR song)                                                                                                                                                                                                  | Search modes - Find all my search terms |
| S1 | TI/AB(pregnancy OR Pregnancies OR Gestation OR Fertilization OR Postnatal OR Postpartum OR Antenatal OR perinatal OR antepartum OR peripartum OR Pregnant Women OR Labor, Obstetric OR delivery OR labor OR Parturition OR childbirth OR birth* OR puerperium OR doing month) | Search modes - Find all my search terms |

**Search Strategy in Airiti Library**

生產 OR 懷孕 OR 孕婦 OR 妊娠 OR 產婦 OR 產程 OR 產後 OR 坐月子 OR 安胎

音樂 OR 唱歌 OR 旋律 OR 爵士

**Search Strategy in NDLTD**

生產 + 懷孕 + 孕婦 + 妊娠 + 產婦 + 產程 + 產後 + 坐月子 + 安胎

音樂 + 唱歌 + 旋律 + 爵士

**Table S3.** Revised Cochrane risk-of-bias tool (RoB 2.0) for quality assessment of included RCTs.

|                      |                                                                |                                                                                                                                                                                                                       |                 |                 |                 |                     |
|----------------------|----------------------------------------------------------------|-----------------------------------------------------------------------------------------------------------------------------------------------------------------------------------------------------------------------|-----------------|-----------------|-----------------|---------------------|
| Domain1.             | Risk of bias arising from the randomization process            |                                                                                                                                                                                                                       |                 |                 |                 |                     |
| Domain2              | Risk of bias due to deviations from the intended interventions |                                                                                                                                                                                                                       |                 |                 |                 |                     |
| Domain3              | Risk of bias due to missing outcome data                       |                                                                                                                                                                                                                       |                 |                 |                 |                     |
| Domain4              | Risk of bias in measurement of the outcome                     |                                                                                                                                                                                                                       |                 |                 |                 |                     |
| Domain5              | Risk of bias in selection of the reported result               |                                                                                                                                                                                                                       |                 |                 |                 |                     |
| Overall risk of bias | Low risk of bias                                               | The study is judged to be at low risk of bias for all domains for this result.                                                                                                                                        |                 |                 |                 |                     |
|                      | Some concerns                                                  | The study is judged to raise some concerns in at least one domain for this result, but not to be at high risk of bias for any domain.                                                                                 |                 |                 |                 |                     |
|                      | High risk of bias                                              | The study is judged to be at high risk of bias in at least one domain for this result. Or the study is judged to have some concerns for multiple domains in a way that substantially lowers confidence in the result. |                 |                 |                 |                     |
|                      | <b>Domain 1</b>                                                | <b>Domain 2</b>                                                                                                                                                                                                       | <b>Domain 3</b> | <b>Domain 4</b> | <b>Domain 5</b> | <b>Overall risk</b> |
| Chang et al. 2008    | Some concern                                                   | Some concern                                                                                                                                                                                                          | Low             | High            | Some concern    | High                |
| Yang et al. 2009     | Low                                                            | Some concern                                                                                                                                                                                                          | Low             | High            | Some concern    | High                |
| Kafali et al. 2011   | Some concern                                                   | Some concern                                                                                                                                                                                                          | Low             | High            | Some concern    | High                |
| Guerrero et al. 2012 | Some concern                                                   | Some concern                                                                                                                                                                                                          | Low             | High            | Low             | High                |
| Wu et al. 2012       | Some concern                                                   | Some concern                                                                                                                                                                                                          | Low             | High            | Some concern    | High                |
| Cao et al. 2016      | Low                                                            | Some concern                                                                                                                                                                                                          | Low             | High            | Some concern    | High                |



|                                |              |              |      |      |              |      |
|--------------------------------|--------------|--------------|------|------|--------------|------|
| Liu et al. 2016                | Some concern | Some concern | Low  | High | Some concern | High |
| Toker and K öm ürc ü 2017      | Low          | Some concern | Low  | High | Some concern | High |
| Nwebube et al. 2017            | Some concern | Some concern | High | High | Low          | High |
| Garcia-Gonzalez et al. 2018    | Low          | Some concern | Low  | High | Some concern | High |
| Teckenberg-Jansson et al. 2019 | Some concern | Some concern | Low  | High | Some concern | High |

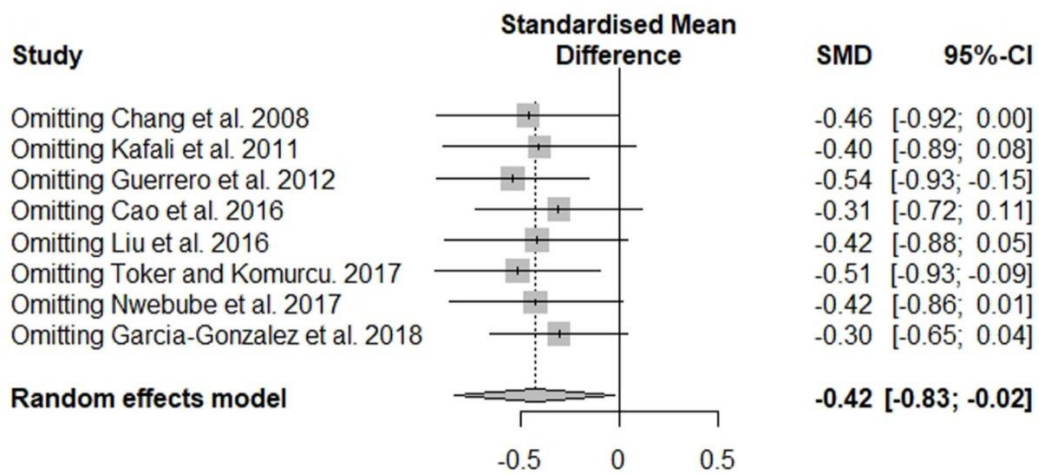

**Figure S1.** Sensitivity analyses of music interventions on anxiety in pregnant women by omitting each study. SMD, standardized mean difference; CI, confidence interval.

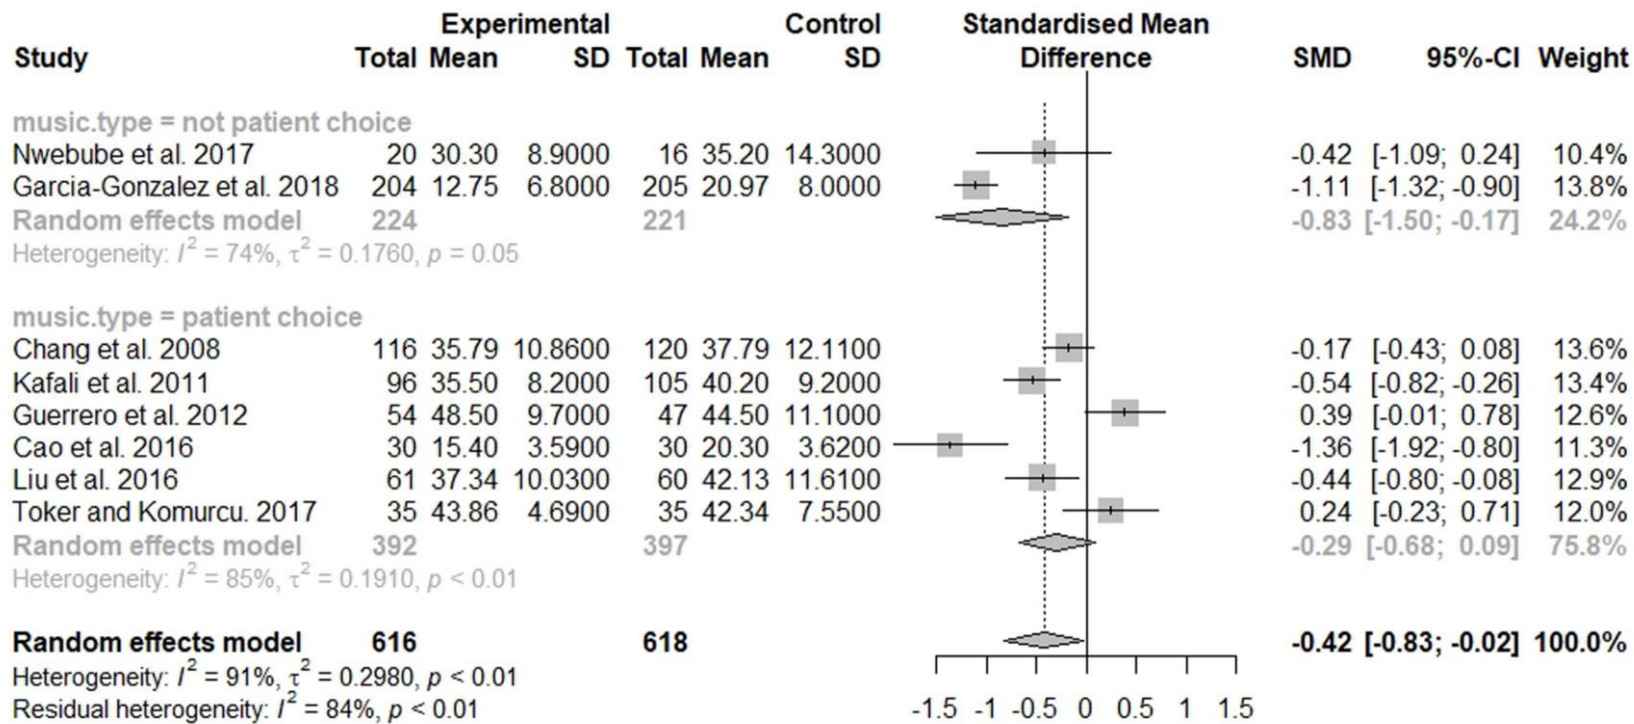

**Figure S2.** Forest plot of pooled anxiety scores after the intervention, comparing the music group and the control group (subgroup analysis by the music type). SMD, standardized mean difference; CI, confidence interval.

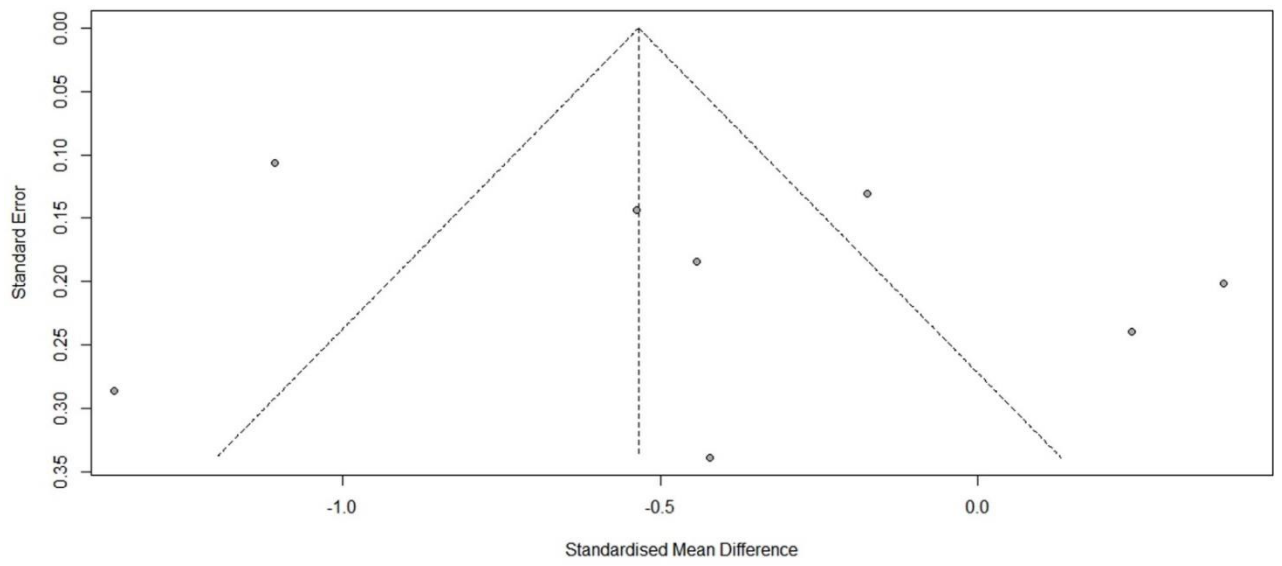

**Figure S3.** The Funnel plot of the standard error by standardized mean difference of the studies included in the meta-analysis. Egger's test, slope=-1.04,  $p = 0.38$ .
